# Supplementary material for: Cytokines regulate the antigen-presenting characteristics of human circulating and tissue-resident intestinal ILCs
Source: PubMed Central journal article supplement (PMC7184749; doi:10.1038/s41467-020-15695-x), 2020-04-27
Supplement: 41467_2020_15695_MOESM1_ESM.pdf [file 41467_2020_15695_MOESM1_ESM.pdf]

**Cytokines regulate the antigen-presenting characteristics of human  
circulating and tissue-resident intestinal ILCs**

Rao *et al.*

## Supplementary Figures

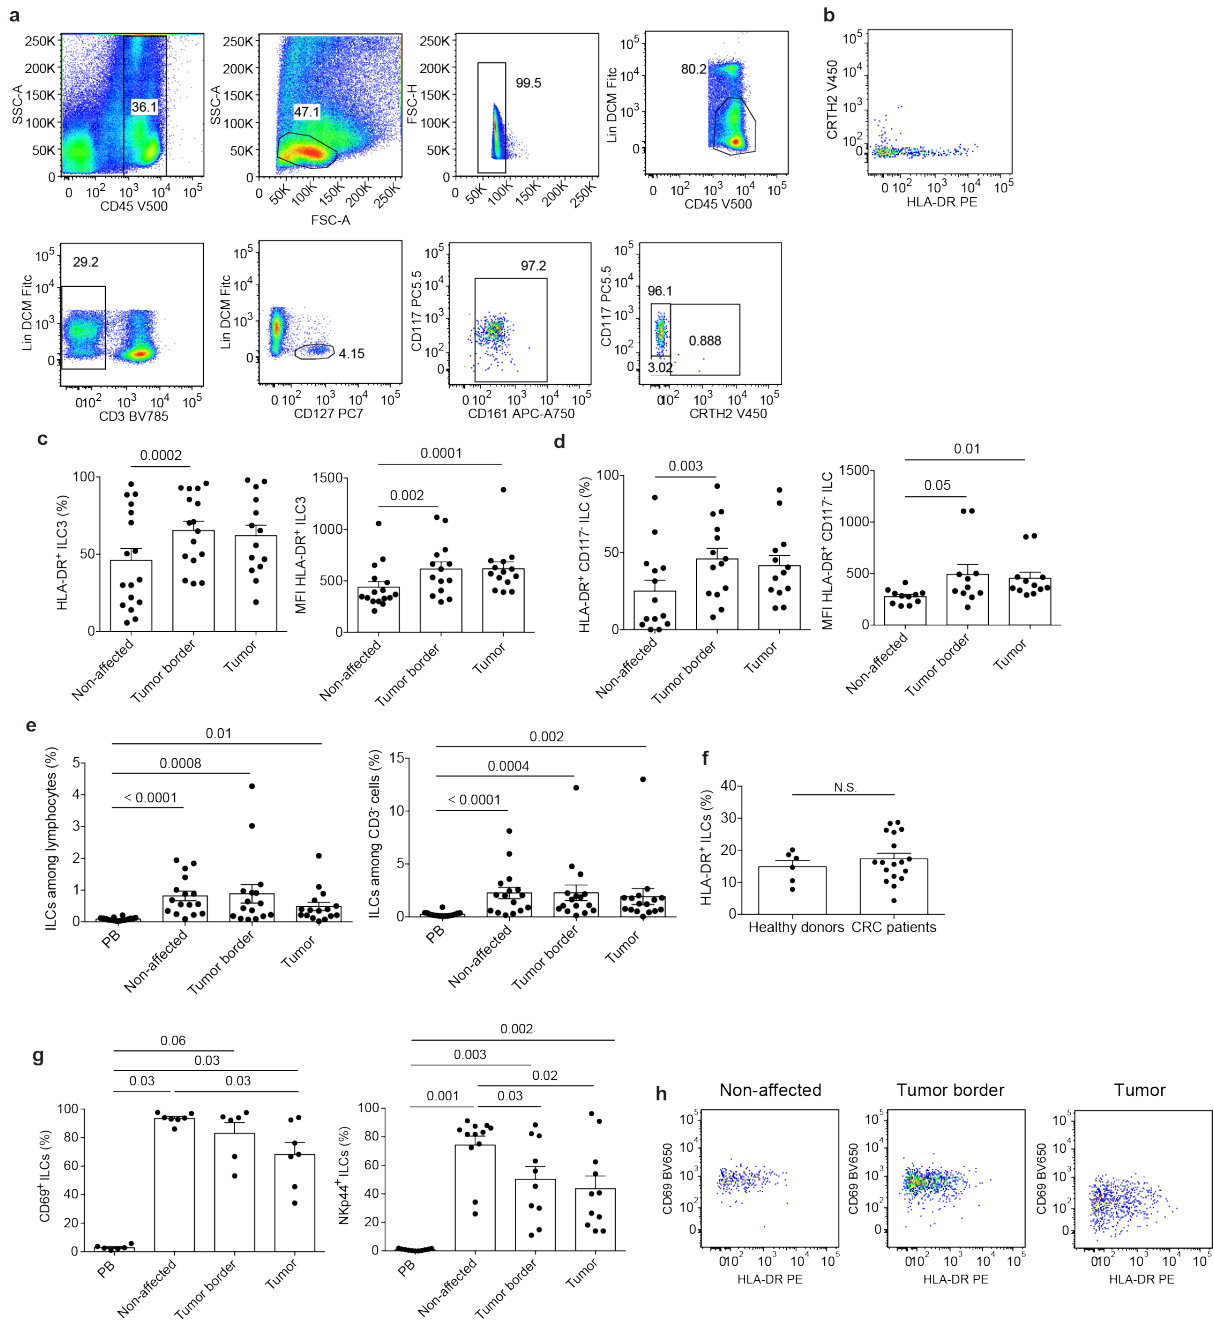

**Supplementary Figure 1.** (a) Gating strategy for assessing intestinal ILC subsets presented in Fig. 1a. Same gating strategy was used for analyzing or sorting PB and intestinal ILC subsets presented in Fig. 2a, c, Fig. 4b, d, Fig. 5a, b and Fig. 7a, as well as Supplementary Figures 1h, 2a, 2c, 5, 6c, 9, 10a, 10c, 11-13, 14a and 17b. (b) Representative plot of CRTH2 and HLA-DR expression on colonic CD127<sup>+</sup>CD161<sup>+</sup> ILCs. (c, d) Frequency and MFI of HLA-DR expression

on (c) ILC3 and (d) CD117<sup>-</sup> ILCs from non-affected colon, tumor border and central tumor tissues; N (patients, ILC3) = 17 (frequency) and 16 (MFI); N (patients, CD117<sup>-</sup> ILCs) = 15 (frequency) and 12 (MFI). Not all sub-anatomical regions could be obtained for every donor. Bars and error bars indicate mean and SEM; statistical significance was assessed using two-sided Wilcoxon matched-pairs signed rank test. (e) Frequency of ILCs among total CD45<sup>+</sup> lymphocytes and CD3<sup>-</sup>CD45<sup>+</sup> lymphocytes in PB, non-affected colon, tumor border and central tumor tissues; N (patients) = 16; bars and error bars indicate mean and SEM; statistical significance was assessed using Friedman test and Dunn's multiple comparison test. (f) Frequency of HLA-DR<sup>+</sup> ILCs in PB of healthy individuals (N = 6) and patients with CRC (N = 18); bars and error bars indicate mean and SEM; statistical significance was assessed using two-sided Wilcoxon matched-pairs signed rank test. (g) CD69 and NKp44 expression on ILCs from PB, non-affected colon, tumor border and central tumor tissues; N (patients) = 7 (for CD69) and 12 (for NKp44). Not all sub-anatomical regions could be obtained for every donor. Bars and error bars indicate mean and SEM; statistical significance was assessed using two-sided Wilcoxon matched-pairs signed rank test. (h) Representative plot of CD69 and HLA-DR expression on colonic CD127<sup>+</sup>CD161<sup>+</sup> ILCs from different sub-anatomical regions. Source data are provided as a source data file.

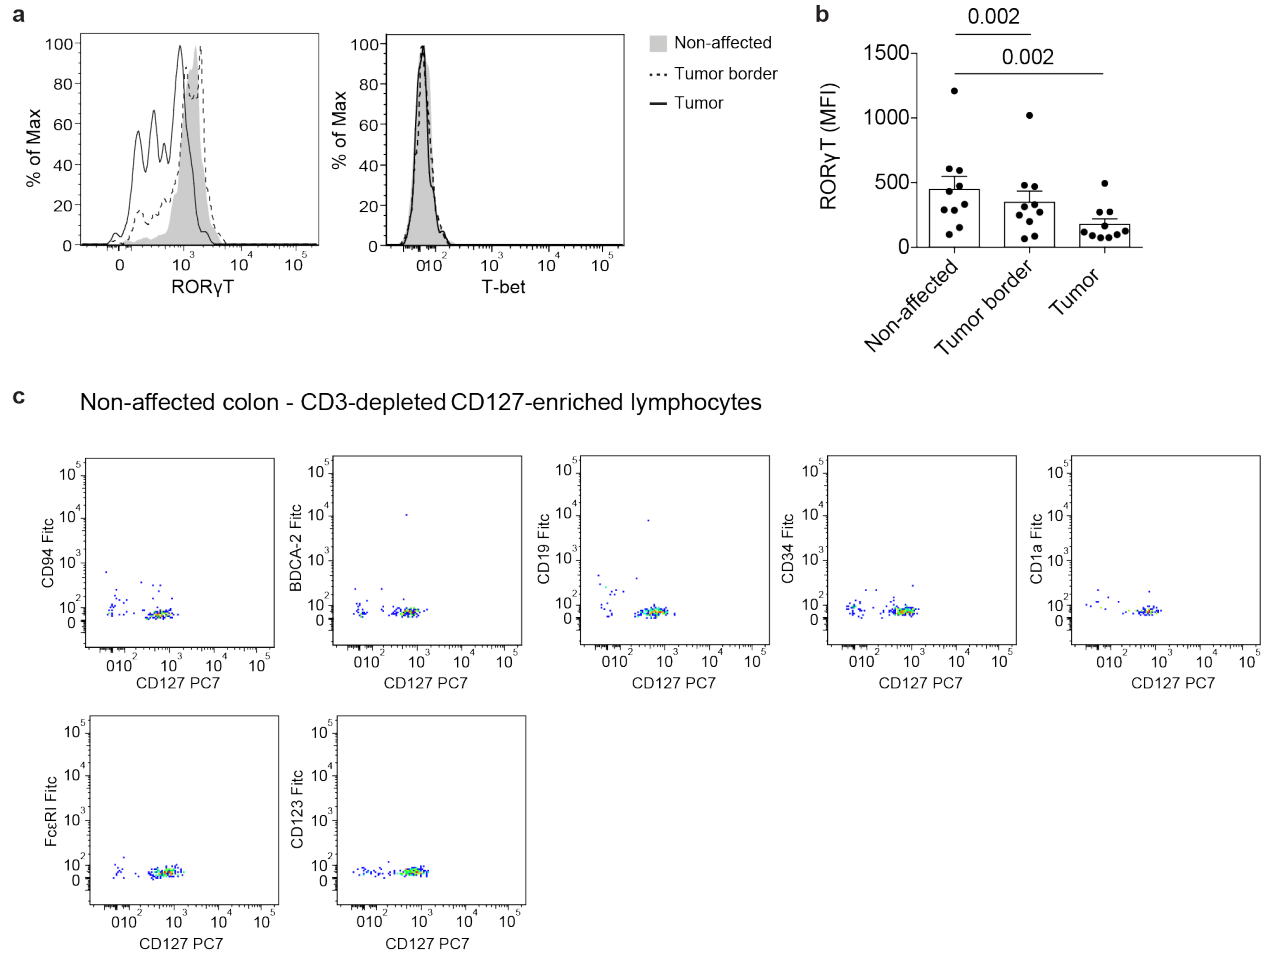

**Supplementary Figure 2.** (a) Histograms of ROR $\gamma$ T and T-bet expression in colon-derived ILCs from different sub-anatomical areas; representative plots of one out of 10 analyzed donors are depicted. (b) Mean fluorescence intensity of ROR $\gamma$ T expression in colon-derived ILCs; N (patients) = 10; bars and error bars indicate mean and SEM; statistical significance was assessed using two-sided Wilcoxon matched-pairs signed rank test. Source data are provided as a source data file. (c) Lineage marker expression on CD127<sup>+</sup>CD3<sup>-</sup> lymphocytes from non-affected colon tissue. Colonic mononuclear cells were magnetically depleted for CD3 and enriched for CD127-expressing cells prior to flow cytometric analysis. CD3<sup>+</sup> cell-contamination was excluded by CD3 staining of the purified fraction. Depicted are CD3<sup>-</sup> lymphocytes.

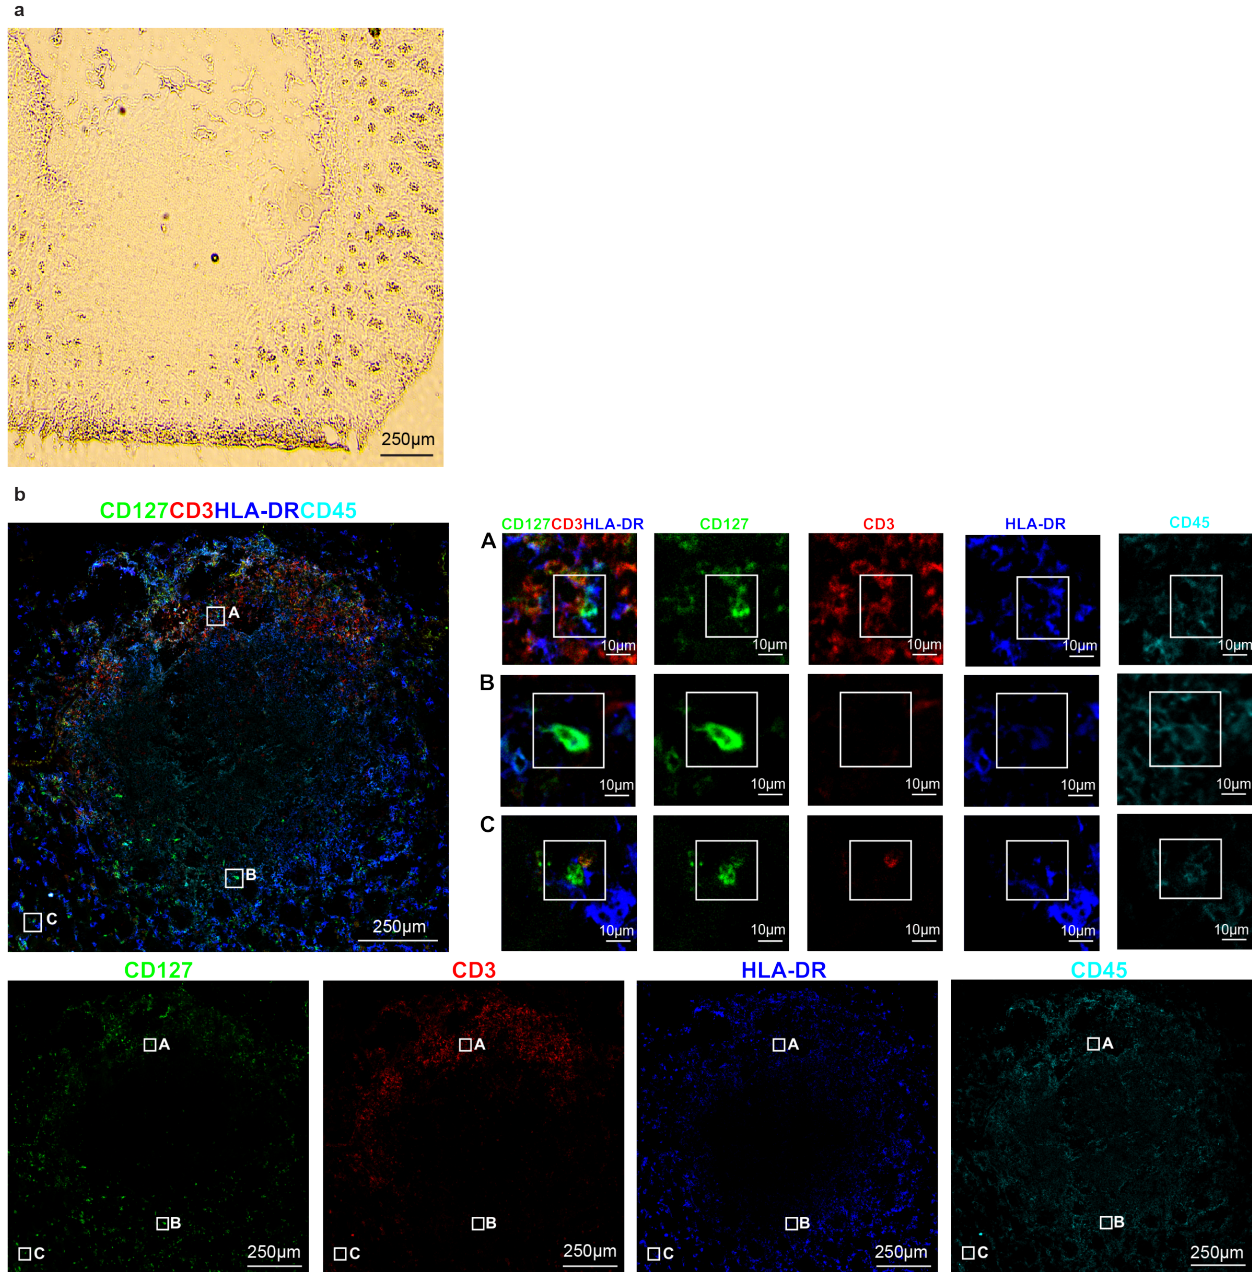

**Supplementary Figure 3.** Lymphoid follicle-containing region of non-affected colon acquired by (a) light and (b) multicolor immunofluorescence microscopy. Depicted are the distribution and HLA-DR expression of  $CD127^+CD3^-CD45^+$  ILCs and  $CD3^+$  T cells, respectively. Magnified regions show examples of (A)  $HLA-DR^+CD127^+$  ILCs in contact with  $CD3^+$  T cells, (B)  $HLA-DR^+CD127^+$  ILCs alone and (C)  $CD127^+$  ILCs co-localized with  $HLA-DR^{hi}CD45^+$  cells and  $CD3^+$  T cells; individual channels are shown separately. Representative of 3 patients analyzed in 3 independent experiments.

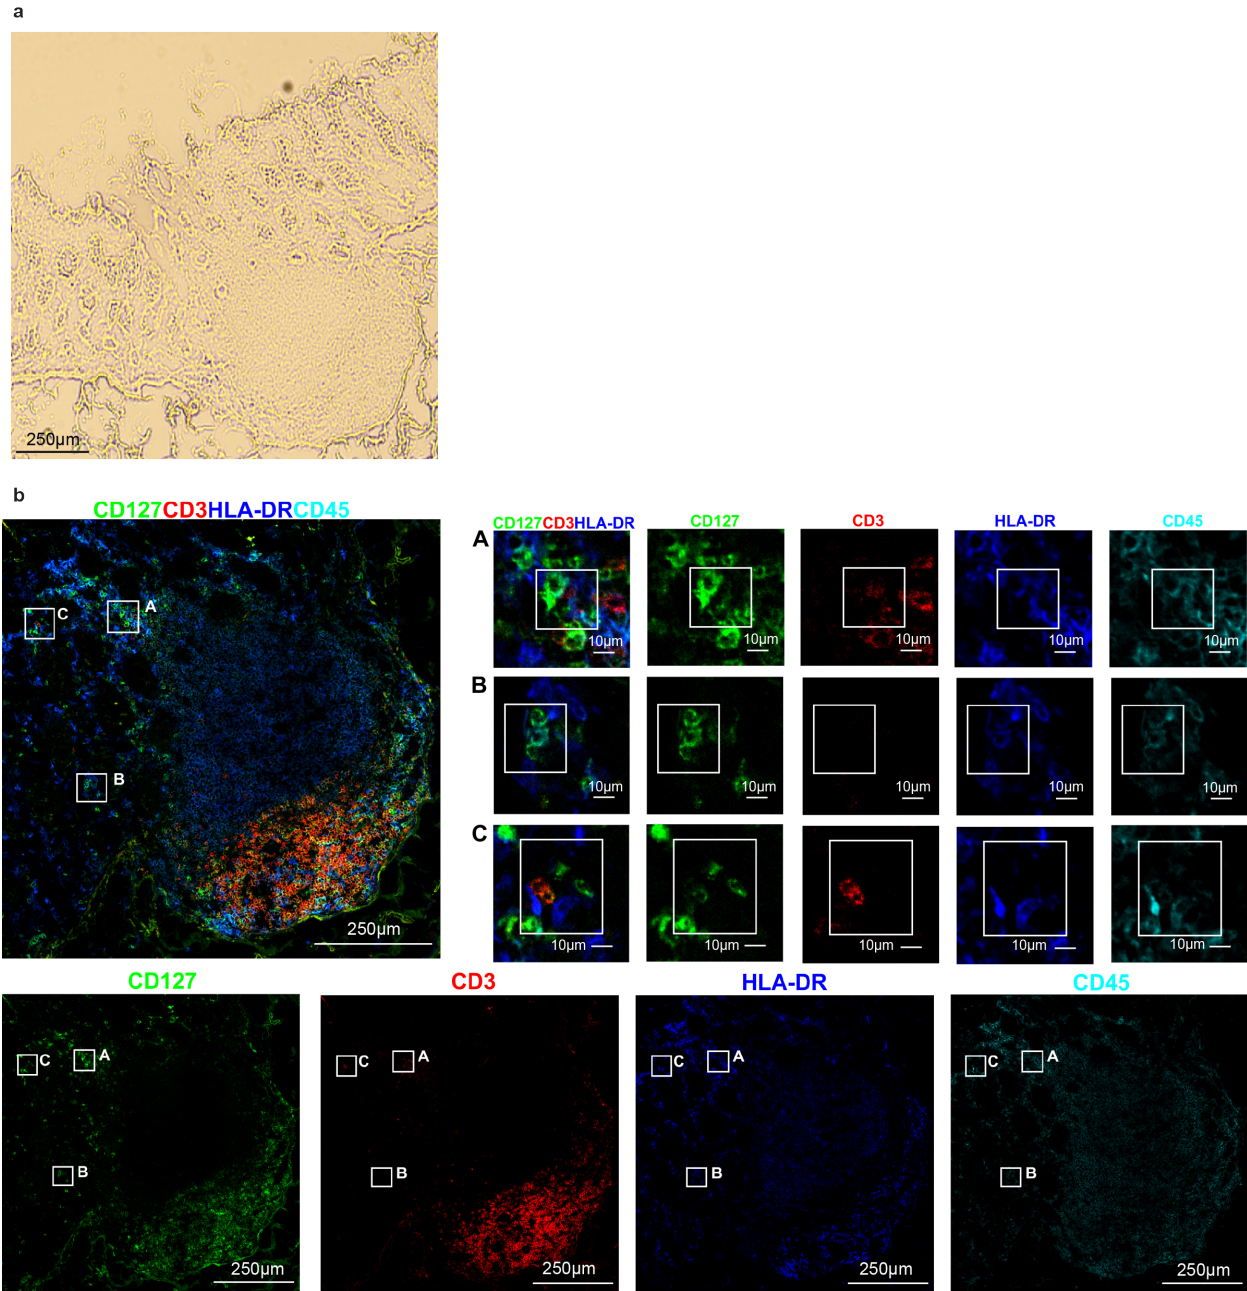

**Supplementary Figure 4.** Lymphoid follicle-containing region of colorectal tumor border tissue acquired by (a) light and (b) multicolor immunofluorescence microscopy. Depicted are the distribution and HLA-DR expression of  $CD127^+CD3^-CD45^+$  ILCs and  $CD3^+$  T cells, respectively. Magnified regions show examples of (A)  $HLA-DR^+CD127^+$  ILCs in contact with  $CD3^+$  T cells, (B)  $HLA-DR^+CD127^+$  ILCs alone and (C)  $CD127^+$  ILCs co-localized with  $HLA-DR^{hi}CD45^+$  cells and  $CD3^+$  T cells; individual channels are shown separately. Representative of 3 patients analyzed in 3 independent experiments.

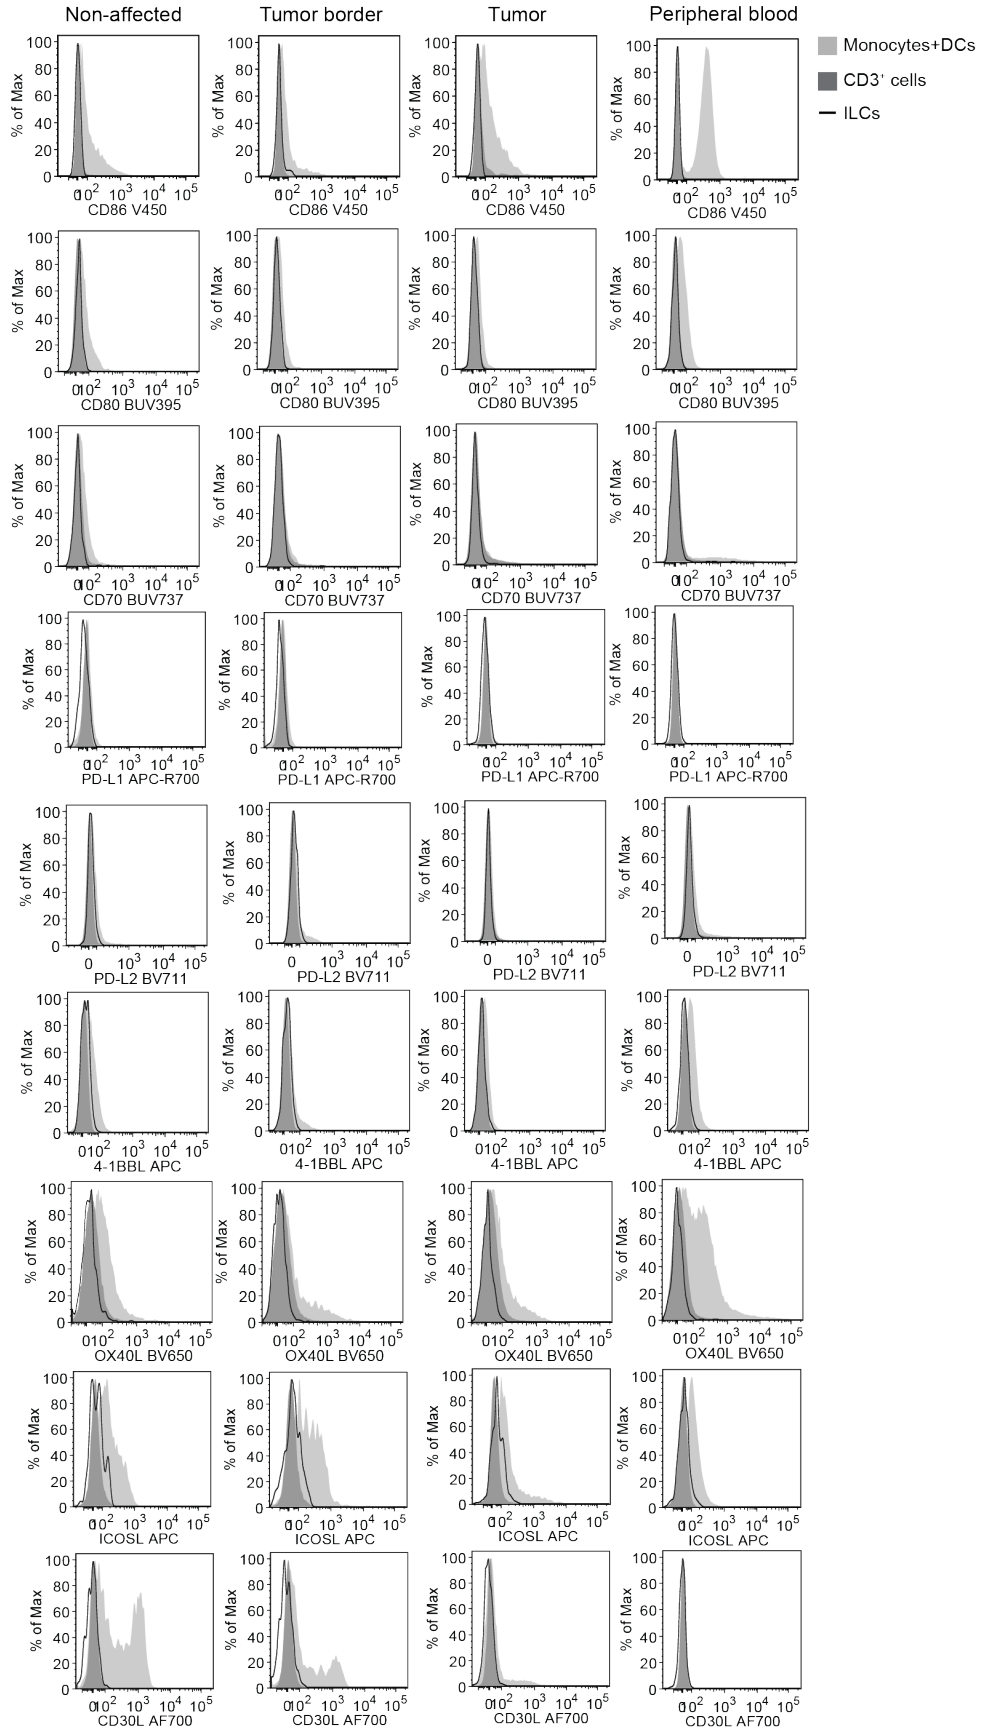

**Supplementary Figure 5.** Co-stimulatory molecule expression on ILCs from PB, non-affected, tumor border and central tumor tissue of the colon. Representative overlay histograms of CD86, CD80, CD70, PD-L1, PD-L2, 4-1BBL, OX40L, ICOSL and CD30L expression on monocytes plus DCs (light grey), CD3<sup>+</sup> T cells (dark grey) and ILCs (black line).



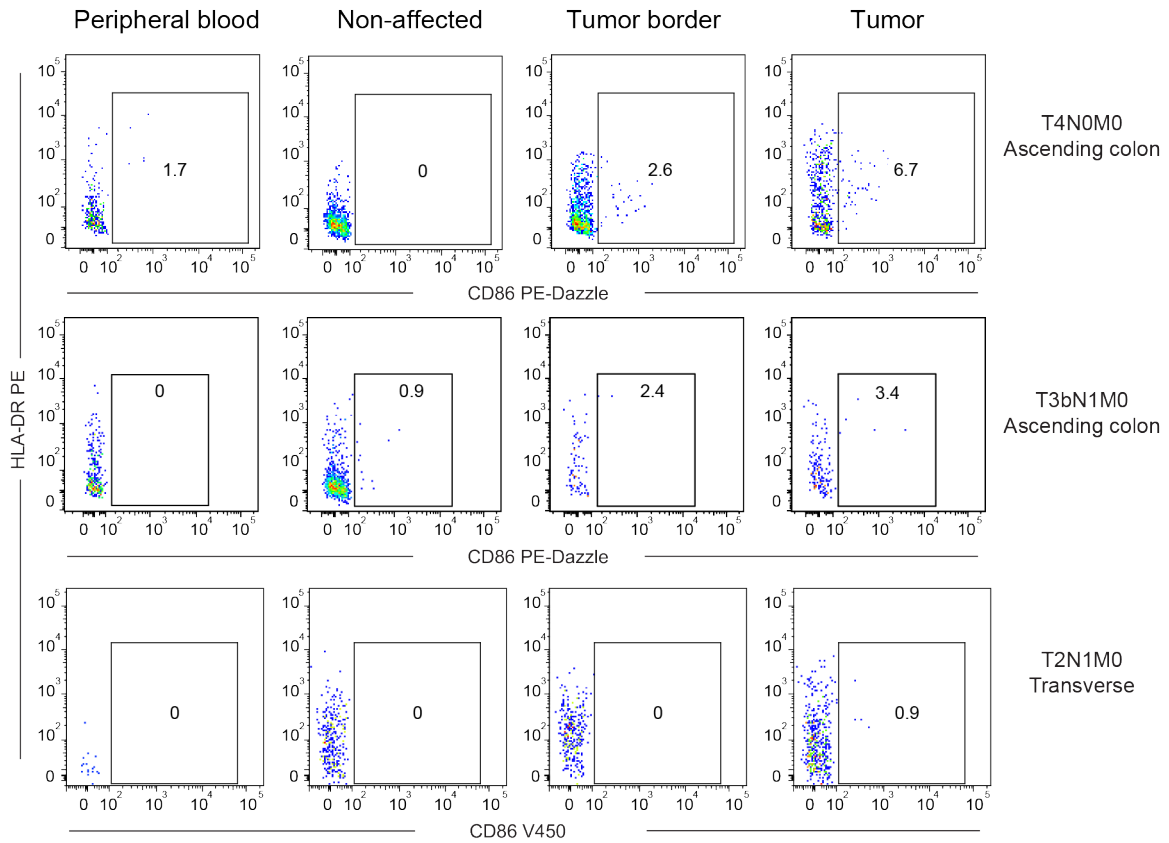

**Supplementary Figure 6.** Various degrees of CD86 expression detected on ILCs from 3 out of 13 patients with CRC analyzed.

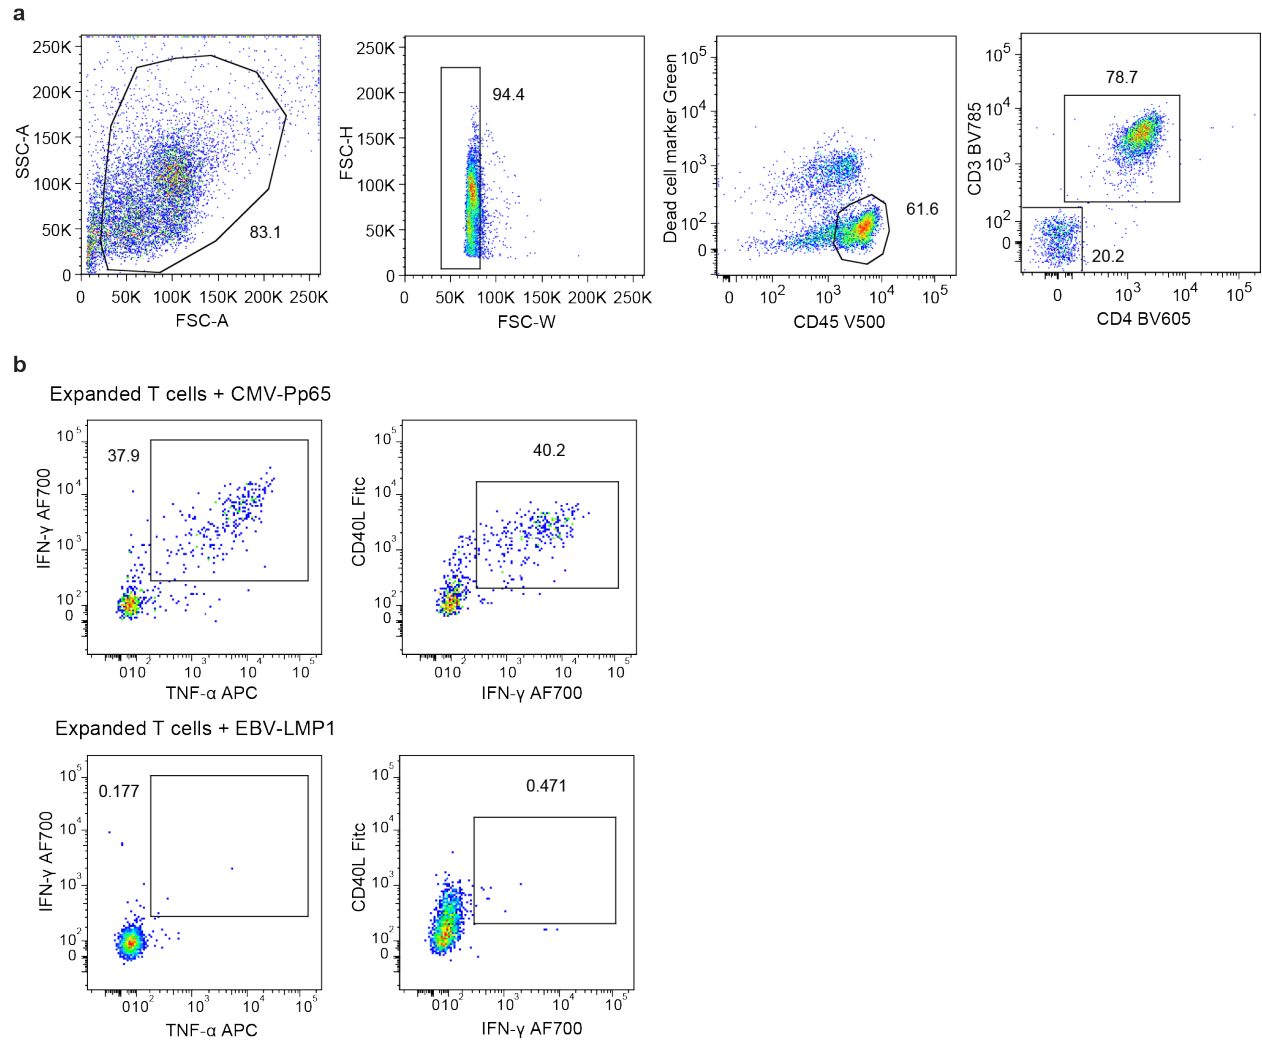

**Supplementary Figure 7. (a)** Gating strategy for assessing T-cell response depicted in Fig. 3b, Fig. 6b and Supplementary Figure 7b, and for analyzing HLA-DR and CD40 expression on antigen presenting cells shown in Fig. 3d and Supplementary Figure 17b. **(b)** Specificity of expanded CMV-pp65-specific CD4<sup>+</sup> memory T cells. IFN- $\gamma$  and TNF- $\alpha$  production as well as CD40L expression of enriched and expanded CMV-pp65-specific CD4<sup>+</sup> memory T cells following stimulation with CMV-pp65 or EBV-LMP1 peptide pools.

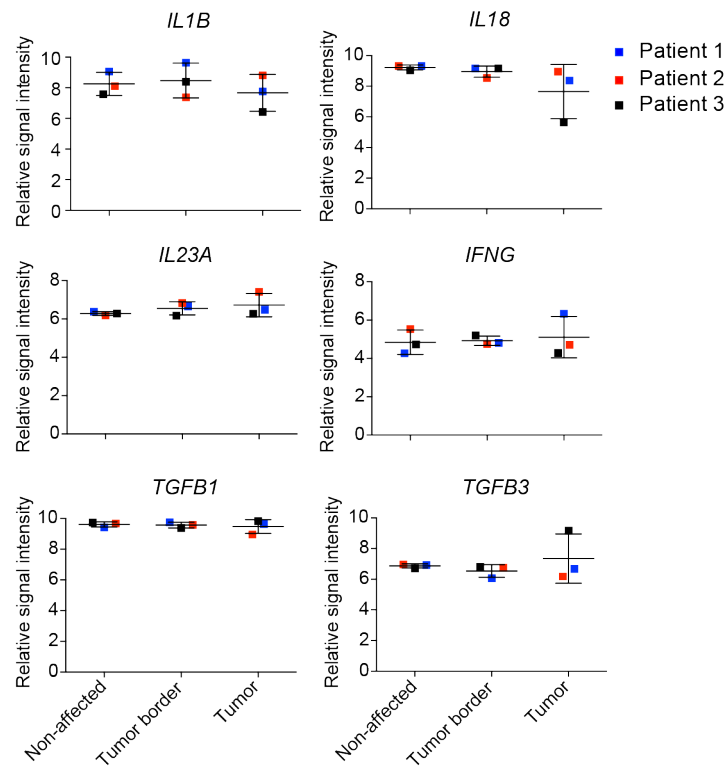

**Supplementary Figure 8.** Relative signal intensity  $\pm$  SD of *IL1B*, *IL18*, *IL23A*, *IFNG*, *TGFB1* and *TGFB3* gene transcripts in non-affected colon, tumor border and central tumor areas from three patients with CRC. Source data are provided as a source data file.

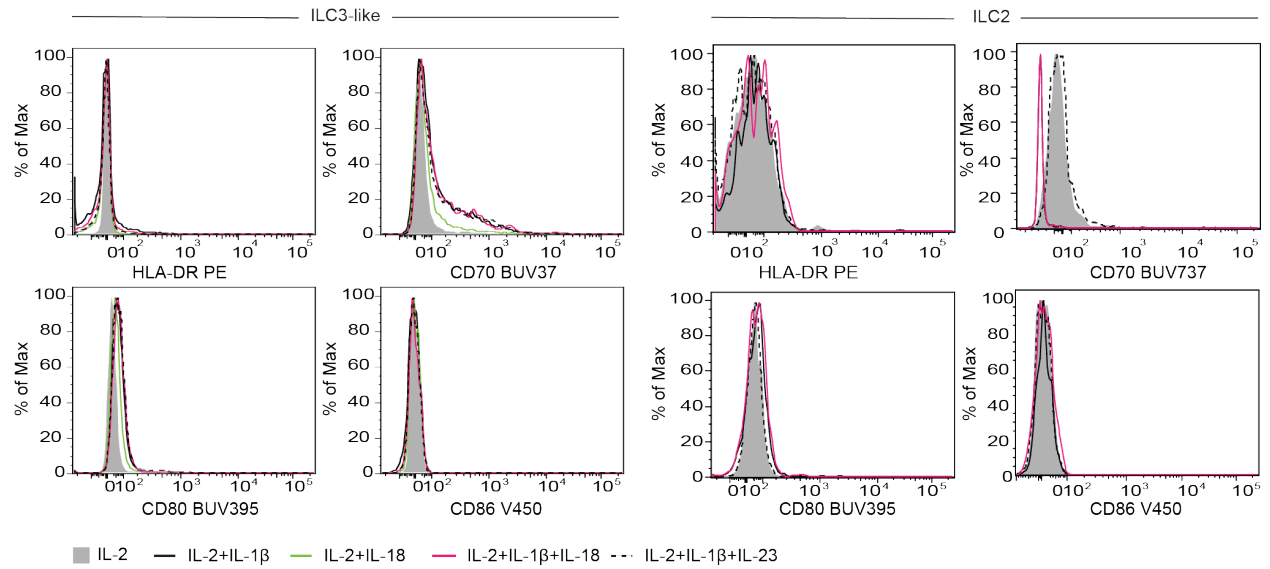

**Supplementary Figure 9.** HLA-DR and co-stimulatory molecule expression on sort-purified PB ILC2 and ILC3-like cells after 24h of treatment with indicated cytokine combinations.

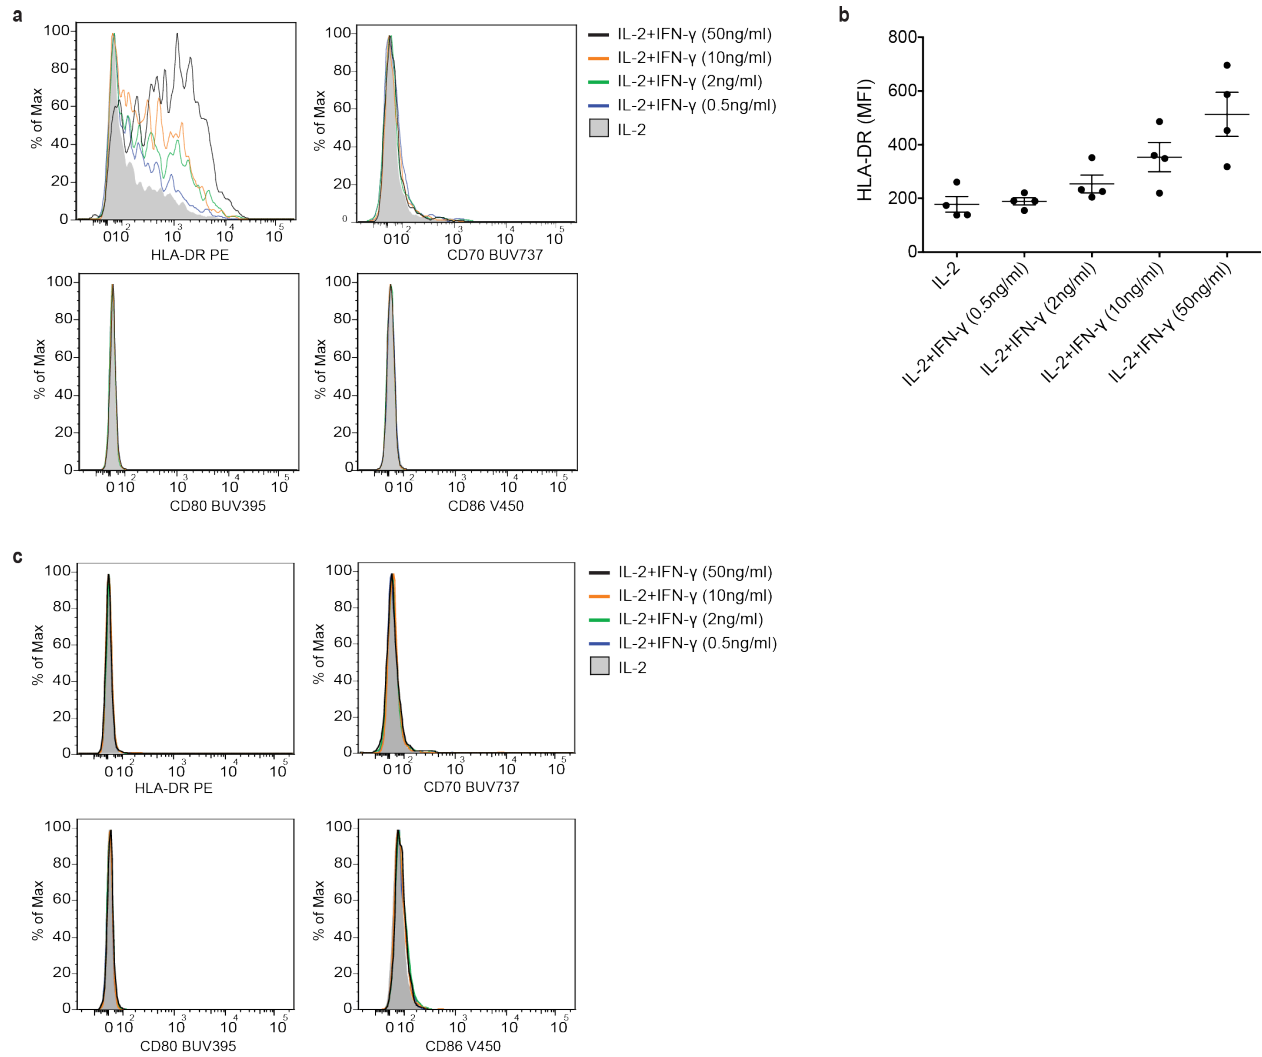

**Supplementary Figure 10.** Dose response of PB ILC subsets to IFN- $\gamma$  stimulation. HLA-DR and co-stimulatory molecule expression was assessed on sort-purified (**a**, **b**) ILC3-like cells and (**c**) ILC2 following 5 days of stimulation. (**b**) N (donors) = 4. Mean  $\pm$  SEM is displayed. Source data are provided as a source data file.

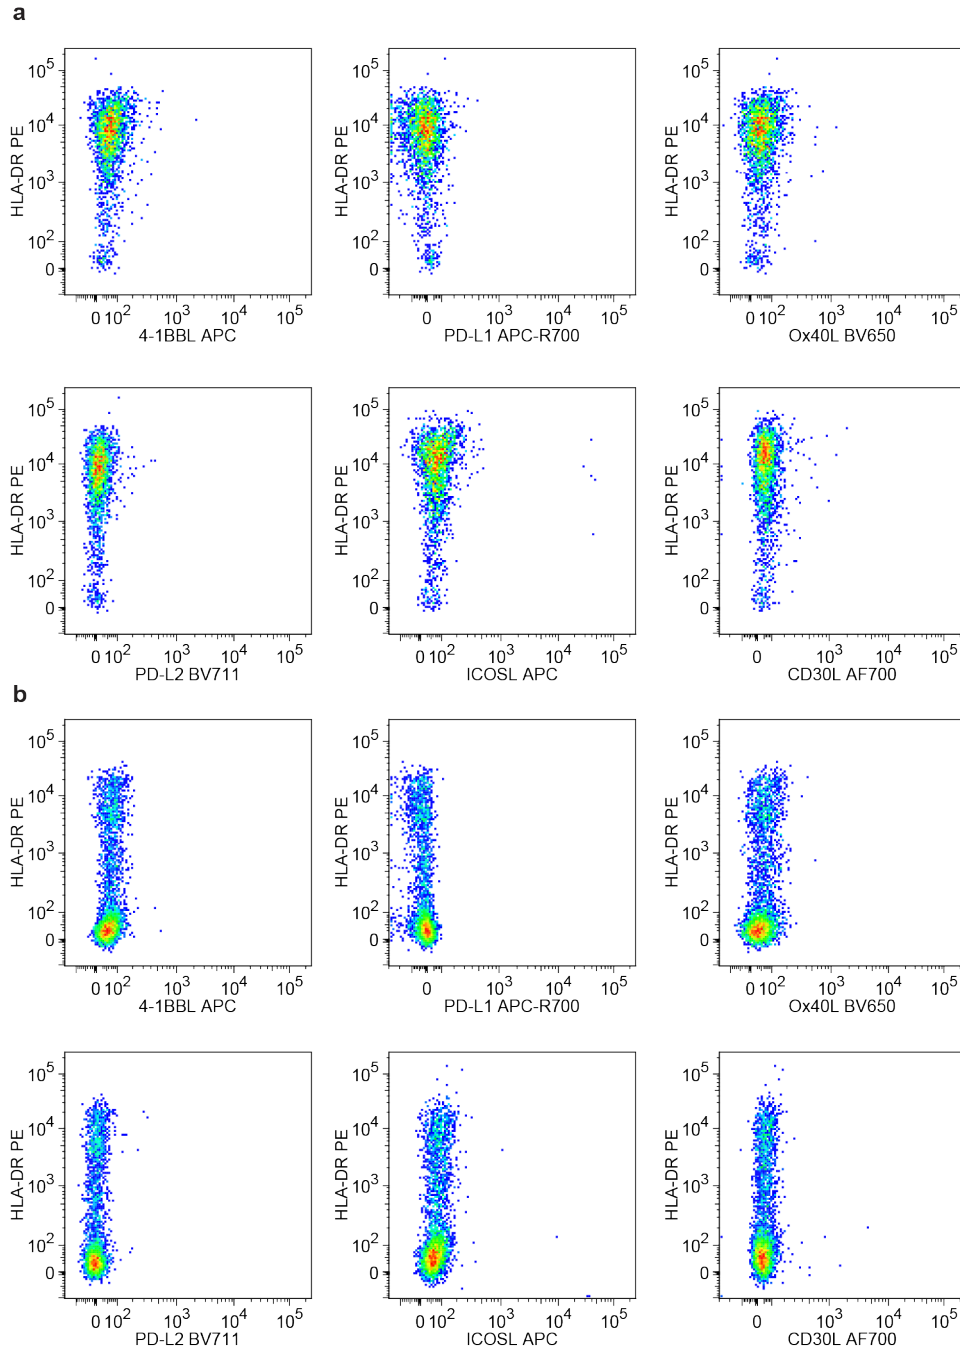

**Supplementary Figure 11.** 4-1BBL, PD-L1, PD-L2, OX40L, ICOSL and CD30L expression on sort-purified PB (a) ILC3-like cells and (b) ILC2 after 5 days stimulation with IL-2 plus IL-1 $\beta$ .

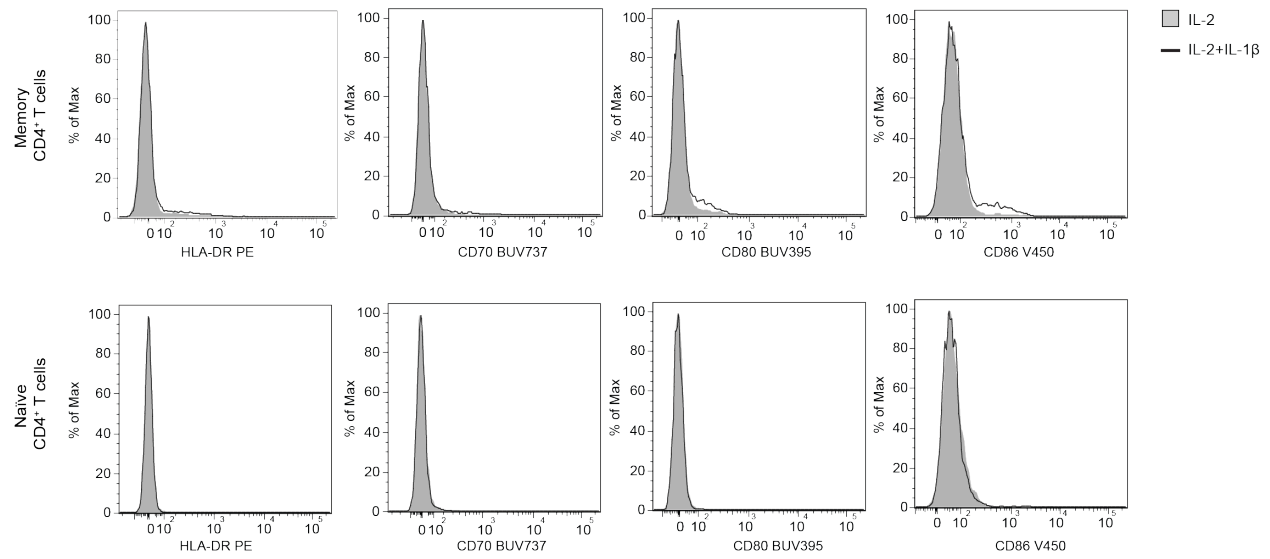

**Supplementary Figure 12.** Overlay histograms of HLA-DR and co-stimulatory molecule expression on sort-purified PB memory and naïve CD4<sup>+</sup> T cells after 5 days stimulation with IL-2 (grey) or IL-2 plus IL-1 $\beta$  (black line).

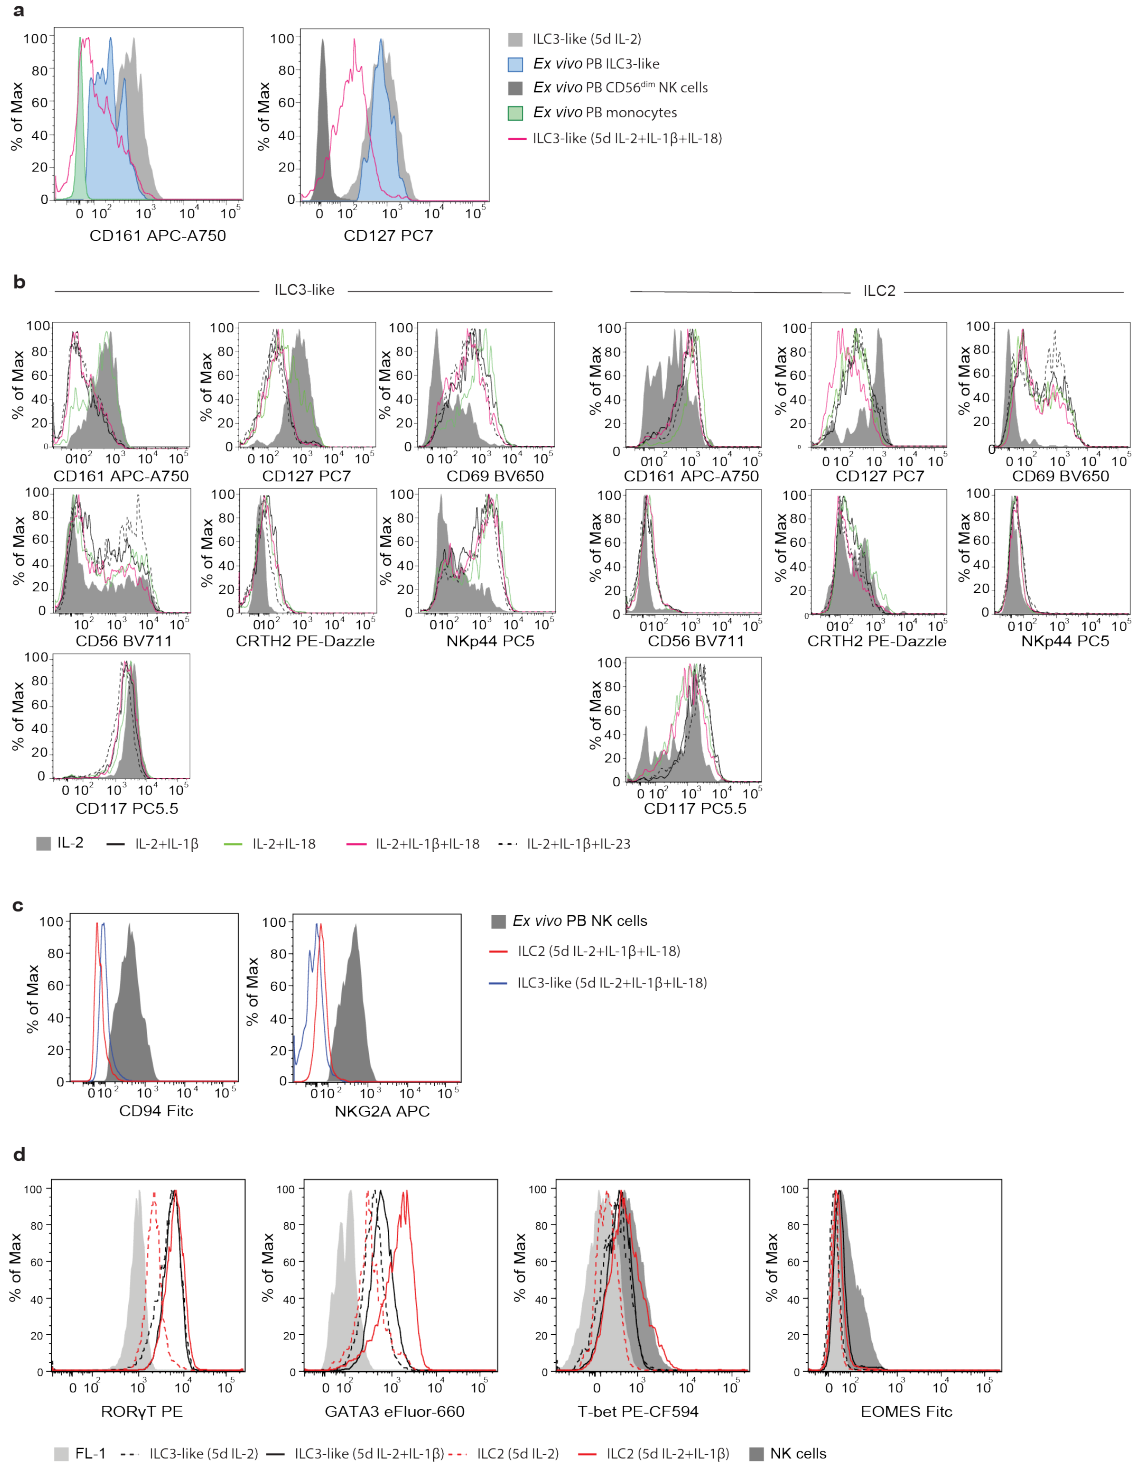

**Supplementary Figure 13.** (a) CD127 and CD161 expression on *ex vivo* ILC3-like cells and ILC3-like cells following 5 days culture with IL-2 or IL-2 plus IL-1 $\beta$  and IL-18. *Ex vivo* PB monocytes and CD56<sup>dim</sup> NK cells were used as negative controls for CD161 and CD127 expression, respectively. (b) Surface marker expression of sort-purified PB ILC2 and ILC3-like



cells after 5 days treatment with indicated cytokine combinations. **(c)** CD94 and NKG2A expression on sort-purified PB ILC2 and ILC3-like cells following 5 days culture with IL-2, IL-1 $\beta$  and IL-18. **(d)** Representative histograms of ROR $\gamma$ T, GATA3, T-bet and EOMES expression by PB ILC2 and ILC3-like cells following 5 days treatment with the indicated cytokine combinations. FL-1 depicts fluorescence minus one control.

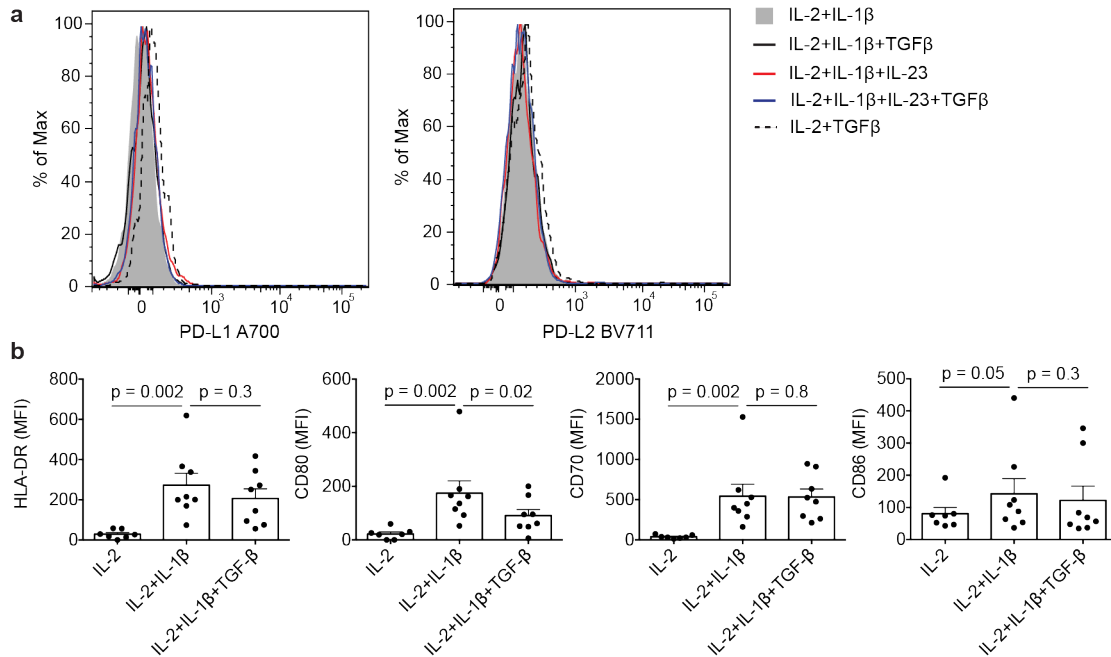

**Supplementary Figure 14. (a)** PD-L1 and PD-L2 expression on PB ILC3-like cells following 5 days culture with indicated cytokine combinations. **(b)** HLA-DR, CD86, CD80 and CD70 expression by sort-purified ILC2 after 5 days of IL-2, IL-2 plus IL-1 $\beta$ , or IL-2 plus IL-1 $\beta$  and TGF- $\beta$  treatment; N (donors) = 8. Due to limited cell numbers, we could not generate data for all conditions for every donor; source data are provided as a source data file. Bars and error bars indicate mean and SEM; statistical significance was assessed using two-sided Wilcoxon matched-pairs signed rank test. Source data are provided as a source data file.

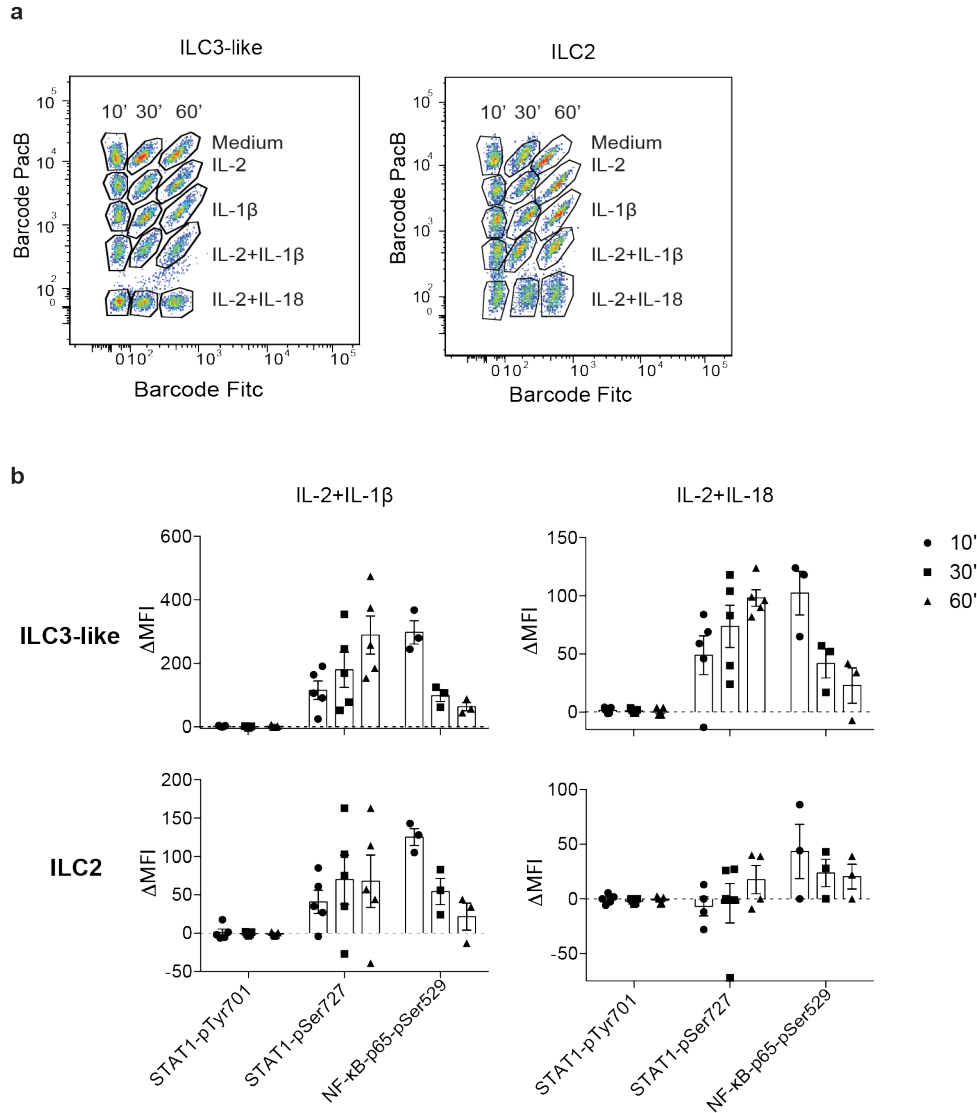

**Supplementary Figure 15. (a)** Gating strategy of barcoded, stimulated PB ILC2 and ILC3-like cells during phospho-flow analysis. **(b)** Mean values of  $\Delta$ MFI STAT1<sub>Tyr701</sub>, STAT1<sub>Ser727</sub> and NF- $\kappa$ B-p65<sub>Ser529</sub> phosphorylation in sorted PB ILC2 and ILC3-like cells following 10-, 30- or 60-minute exposure to IL-2 plus IL-1 $\beta$  or IL-2 plus IL-18. Data was normalized to background MFI. N (donors) = 3 for NF- $\kappa$ B and 5 for STAT1 phosphorylation; Error bars represent SEM. Source data are provided as a source data file.

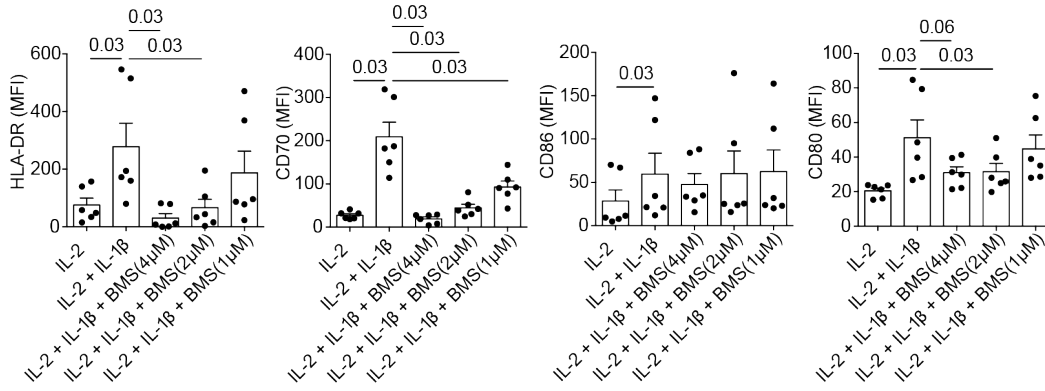

**Supplementary Figure 16.** MFI of HLA-DR, CD70, CD80 and CD86 expression on sorted PB ILC3-like cells, following 72 hours incubation with IL-2, IL-2 plus IL-1 $\beta$ , or IL-2 plus IL-1 $\beta$  in the presence of various concentrations of BMS-345541. N (donors) = 6; bars and error bars indicate mean and SEM; statistical significance was assessed using two-sided Wilcoxon matched-pairs signed rank test. Source data are provided as a source data file.

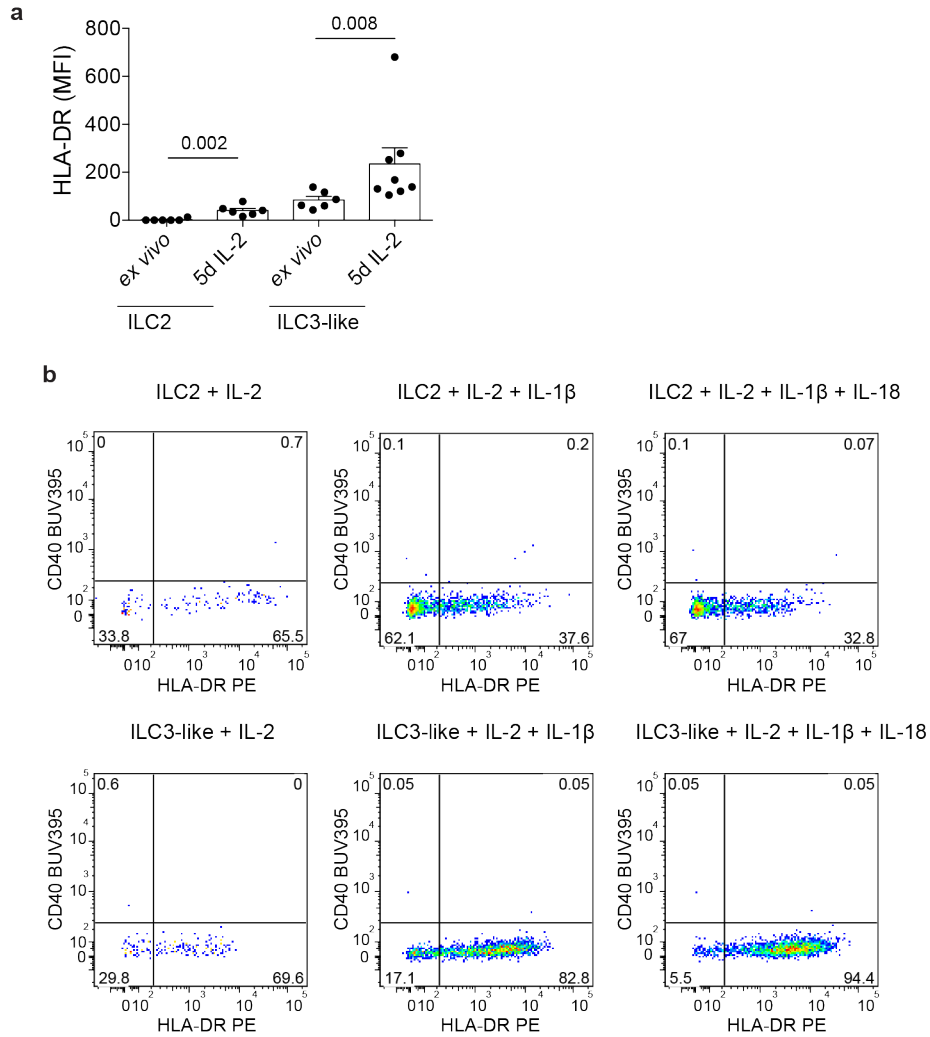

**Supplementary Figure 17. (a)** HLA-DR expression on PB ILC2 and ILC3-like cells *ex vivo* or following 5-day culture with 10U/ml IL-2. N (donors) = 6 for *ex vivo* ILC2 and ILC3-like cells, 6 for expanded ILC2 and 8 for expanded ILC3-like cells; bars and error bars indicate mean and SEM; statistical significance was assessed using two-sided Mann-Whitney *U* test. Source data are provided as a source data file. **(b)** Representative plots of HLA-DR and CD40 expression on stimulated sort-purified PB ILC subsets present in the autologous CMV-pp65-specific co-culture system.

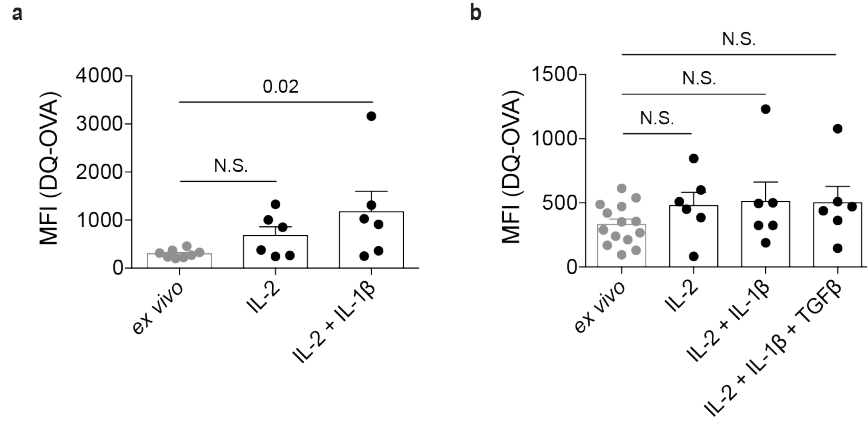

**Supplementary Figure 18.** Fluorescence emission after 4h incubation with 10 $\mu$ g/ml DQ-OVA by PB ILC2 (**a**) or ILC3-like cells (**b**) isolated *ex vivo* (N donors = 8 for ILC2 and 14 for ILC3-like cells) or expanded for 5 days with the indicated cytokine combinations (N donors = 6); Bars and error bars represent mean and SEM; statistical significance was assessed using Mann-Whitney *U* test. Source data are provided as a source data file.

## Supplementary Tables

Table S1. Patient information:

| <b>Number</b> | <b>Age</b> | <b>Gender</b> | <b>Tumor location</b> | <b>Tumor stage</b> |
|---------------|------------|---------------|-----------------------|--------------------|
| #1            | 61         | m             | Rectum                | II                 |
| #2            | 64         | f             | Transverse            | II                 |
| #3            | 78         | f             | Sigmoid               | III                |
| #4            | 60         | f             | Sigmoid               | III                |
| #5            | 70         | m             | Ascending             | II                 |
| #6            | 75         | f             | Ascending             | III                |
| #7            | 72         | f             | Sigmoid               | III                |
| #8            | 79         | m             | Sigmoid               | II                 |
| #9            | 70         | m             | Sigmoid               | III                |
| #10           | 76         | m             | Cecum                 | II                 |
| #11           | 53         | m             | Sigmoid               | II                 |
| #12           | 87         | f             | Transverse            | IV                 |
| #13           | 71         | f             | Cecum                 | II                 |
| #14           | 60         | f             | Transverse            | III                |
| #15           | 75         | f             | Ascending             | II                 |
| #16           | 72         | m             | Ascending             | II                 |
| #17           | 75         | m             | Ascending             | II                 |
| #18           | 41         | f             | Sigmoid               | IV                 |
| #19           | 84         | m             | Sigmoid               | II                 |
| #20           | 81         | m             | Sigmoid               | IV                 |
| #21           | 76         | m             | Ascending             | II                 |
| #22           | 65         | f             | Cecum                 | III                |
| #23           | 48         | m             | Cecum                 | II                 |
| #24           | 54         | f             | Ascending             | II                 |
| #25           | 91         | f             | Transverse            | III                |
| #26           | 81         | m             | Right colic flexure   | III                |
| #27           | 74         | m             | Descending            | II                 |

Table S2. Full list of antibodies used for flow-cytometric analysis and sorting:

**Lineage**

| Reactivity | Clone  | Fluorophore | Catalog #   | Dilution | Company         |
|------------|--------|-------------|-------------|----------|-----------------|
| CD14       | TÜK4   | Fitc        | F0844       | 2:50     | Dako            |
| CD1a       | HI149  | Fitc        | 300103      | 2:50     | Biologend       |
| CD123      | 6H6    | Fitc        | 306013      | 2:50     | Biologend       |
| FcεRIα     | AER-37 | Fitc        | 334607      | 2:50     | Biologend       |
| TCRα/β     | IP26   | Fitc        | 306705      | 2:50     | Biologend       |
| TCRγ/δ     | B1     | Fitc        | 331208      | 2:50     | Biologend       |
| CD94       | DX22   | Fitc        | 305504      | 2:50     | Biologend       |
| BDCA2      | AC144  | Fitc        | 130-113-192 | 2:50     | Miltenyi Biotec |
| CD19       | 4G7    | Fitc        | 392507      | 2:50     | Biologend       |
| CD34       | 581    | Fitc        | 343504      | 2:50     | Biologend       |

**Surface staining**

| Reactivity | Clone   | Fluorophore | Catalog # | Dilution | Company         |
|------------|---------|-------------|-----------|----------|-----------------|
| CD3        | OKT3    | BV785       | 317329    | 1:50     | Biologend       |
| CRTH2      | BM16    | V450        | 561661    | 4:50     | BD Biosciences  |
| CRTH2      | BM16    | PE-Dazzle   | 350125    | 4:50     | Biologend       |
| CD45       | HI30    | V500        | 560777    | 1:50     | BD Biosciences  |
| CD161      | 191B8   | APC-A750    | B30630    | 3:50     | Beckman Coulter |
| CD117      | 104D2D1 | PC5.5       | A66333    | 3:50     | Beckman Coulter |
| CD127      | R34.34  | PC7         | A64618    | 3:50     | Beckman Coulter |
| CD127      | A019D5  | PE-Cy5      | 351323    | 2:50     | Biologend       |
| HLA-DR     | L243    | PE          | 307605    | 1:50     | Biologend       |
| CD80       | L307.4  | BUV395      | 565210    | 2:50     | BD Biosciences  |
| CD70       | Ki-24   | BUV737      | 565339    | 2:50     | BD Biosciences  |
| CD86       | FUN-1   | V450        | 560357    | 2:50     | BD Biosciences  |
| CD86       | IT2.2   | PE-Dazzle   | 305433    | 2:50     | Biologend       |
| PDL1       | MIH1    | APC-R700    | 565188    | 3:50     | BD Biosciences  |
| PDL2       | MIH18   | BV711       | 740818    | 2:50     | BD Biosciences  |
| 4-1BBL     | 5F4     | APC         | 311505    | 2:50     | Biologend       |
| OX40L      | 11C3.1  | Biotin      | 326306    | 2:50     | Biologend       |



|              |        |         |                |      |                 |
|--------------|--------|---------|----------------|------|-----------------|
| Streptavidin | N.A.   | BV650   | 405231         | 1:50 | Biolegend       |
| CD30L        | 116614 | AF700   | FAB1028N-100UG | 2:50 | R&D Systems     |
| ICOSL        | MIH12  | APC     | 130-098-738    | 1:50 | Miltenyi        |
| CD4          | OKT4   | APC-Cy7 | 317417         | 2:50 | Biolegend       |
| CD56         | HCD56  | BV711   | 318336         | 2:50 | Biolegend       |
| NKp44        | Z231   | PC5     | A66903         | 3:50 | Beckman Coulter |
| CD69         | FN50   | BV650   | 310934         | 2:50 | Biolegend       |
| CD40         | 5C3    | BUV395  | 565202         | 1:50 | BD Biosciences  |
| NKG2a        | Z199   | APC     | A60797         | 2:50 | Beckman Coulter |

### Intracellular Staining

| Reactivity    | Clone | Fluorophore | Catalog #   | Dilution | Company         |
|---------------|-------|-------------|-------------|----------|-----------------|
| CD40L (CD154) | 5C8   | Fitc        | 130-100-354 | 1:50     | Miltenyi Biotec |
| CD40L (CD154) | 5C8   | PE-Vio770   | 130-114-134 | 1:50     | Miltenyi Biotec |
| TNF- $\alpha$ | Mab11 | APC         | 502913      | 1:100    | Biolegend       |
| IFN- $\gamma$ | B27   | AF700       | 557995      | 1:100    | BD Biosciences  |

### Transcription factor Staining

| Reactivity     | Clone   | Fluorophore | Catalog #  | Dilution | Company        |
|----------------|---------|-------------|------------|----------|----------------|
| ROR $\gamma$ T | Q21-559 | PE          | 563081     | 1:50     | BD Biosciences |
| T-bet          | 04-46   | PE-CF594    | 562467     | 1:50     | BD Biosciences |
| GATA3          | TWAJ    | eFluor-660  | 50-9966-42 | 1:50     | eBioscience    |
| EOMES          | WD1928  | Fitc        | 11-4877-42 | 1:50     | eBioscience    |

### Phospho-flow

| Reactivity                | Clone         | Fluorophore | Catalog # | Dilution | Company        |
|---------------------------|---------------|-------------|-----------|----------|----------------|
| STAT1-pTyr701             | 4a            | AF647       | 612597    | 1:20     | BD Biosciences |
| STAT1-pSer727             | A15158B       | PE          | 686403    | 1:20     | Biolegend      |
| NF- $\kappa$ B p65- pS529 | K10-895.12.50 | PE-CF594    | 565447    | 1:200    | BD Biosciences |
